# Supplementary material for: Fast uplift in the Southern Patagonian Andes due to long and short term deglaciation and the asthenospheric window underneath
Source: Copernicus journal article supplement (doi:10.5194/egusphere-2023-1711), 2023-08-18

rocks, Step=50 Myr=0.03069

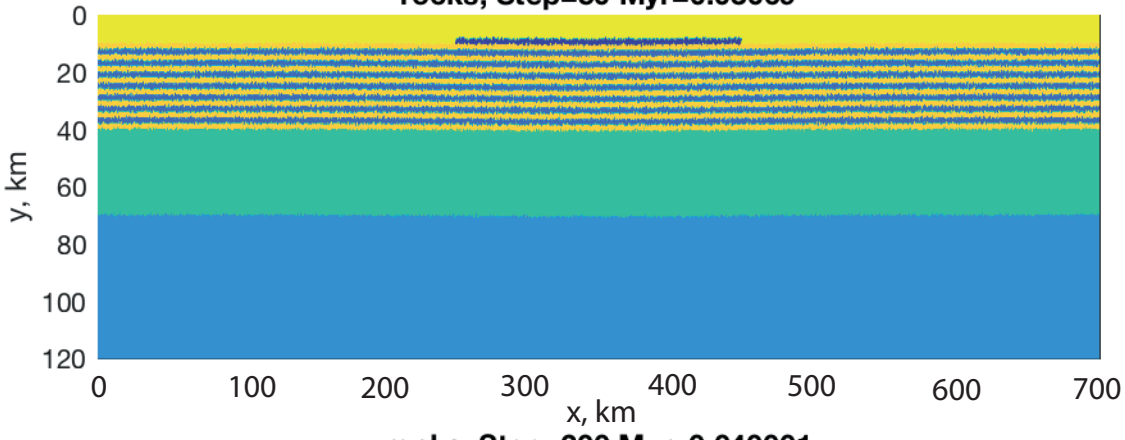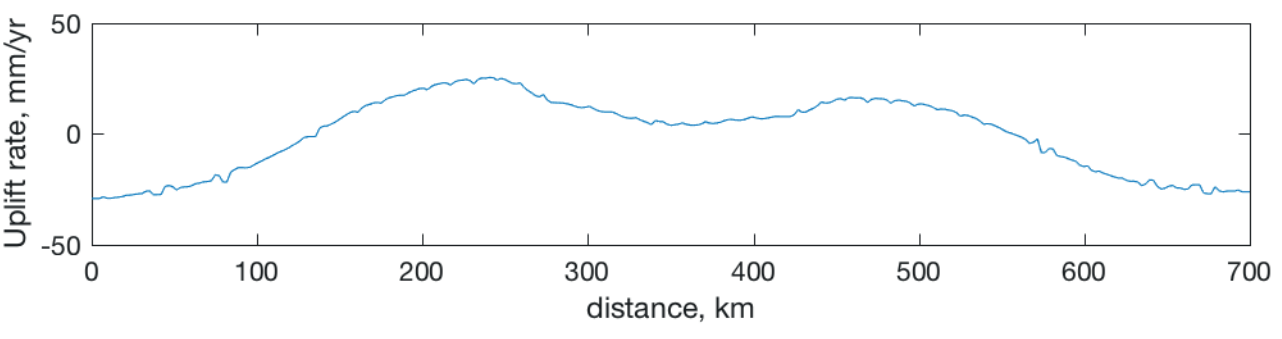

rocks, Step=200 Myr=0.040001

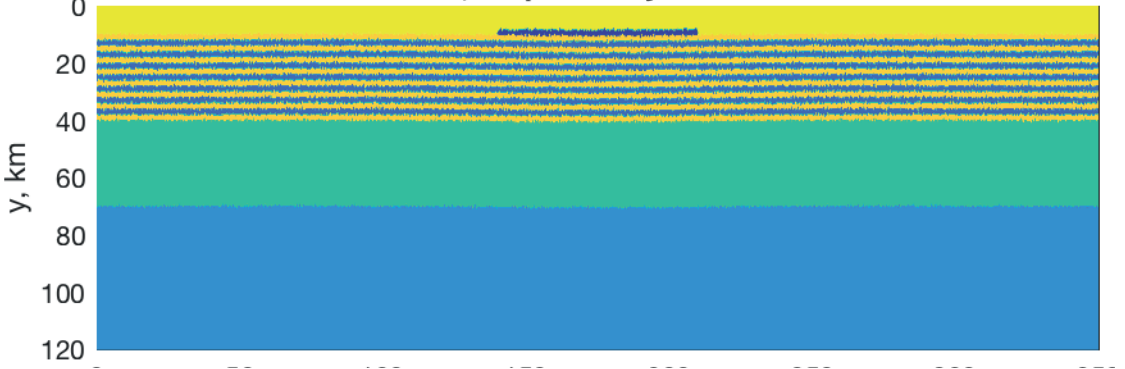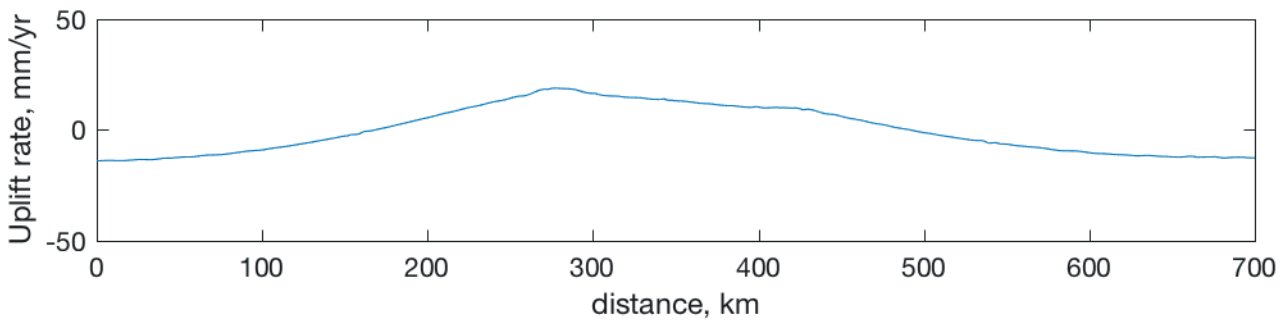

rocks, Step=390 Myr=0.050397

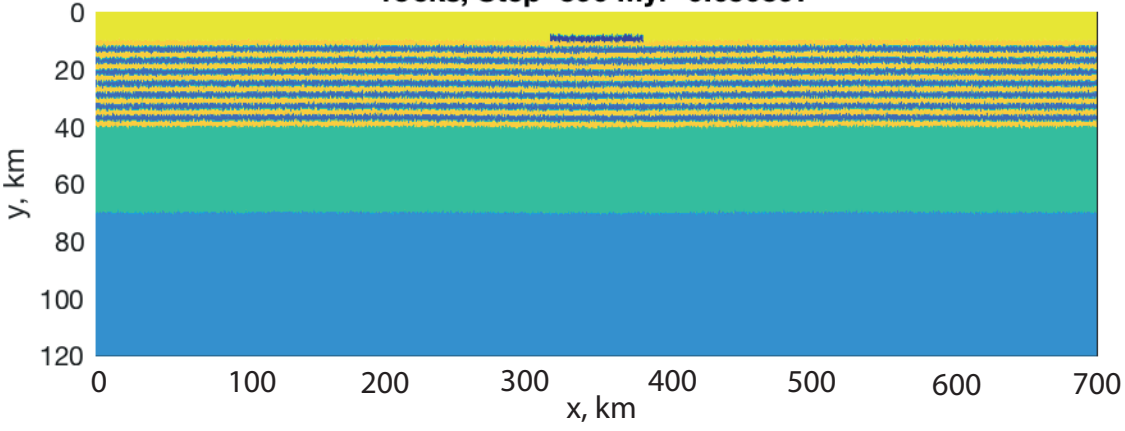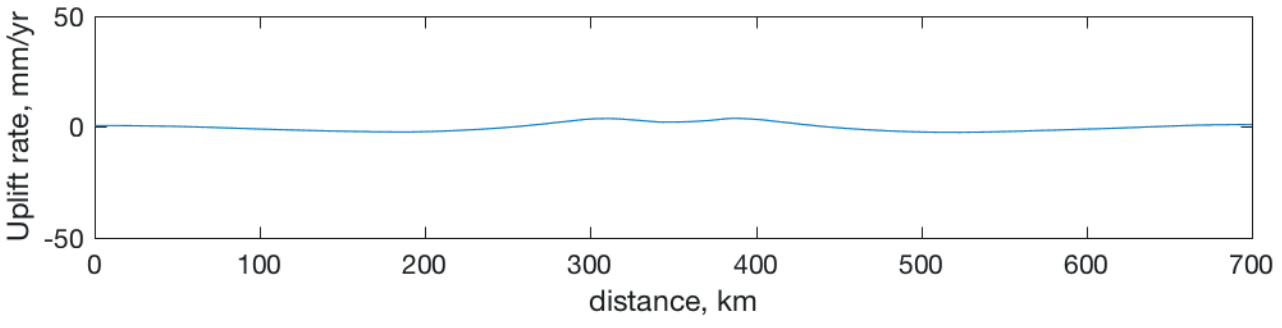

Maximum Uplift Rates on time

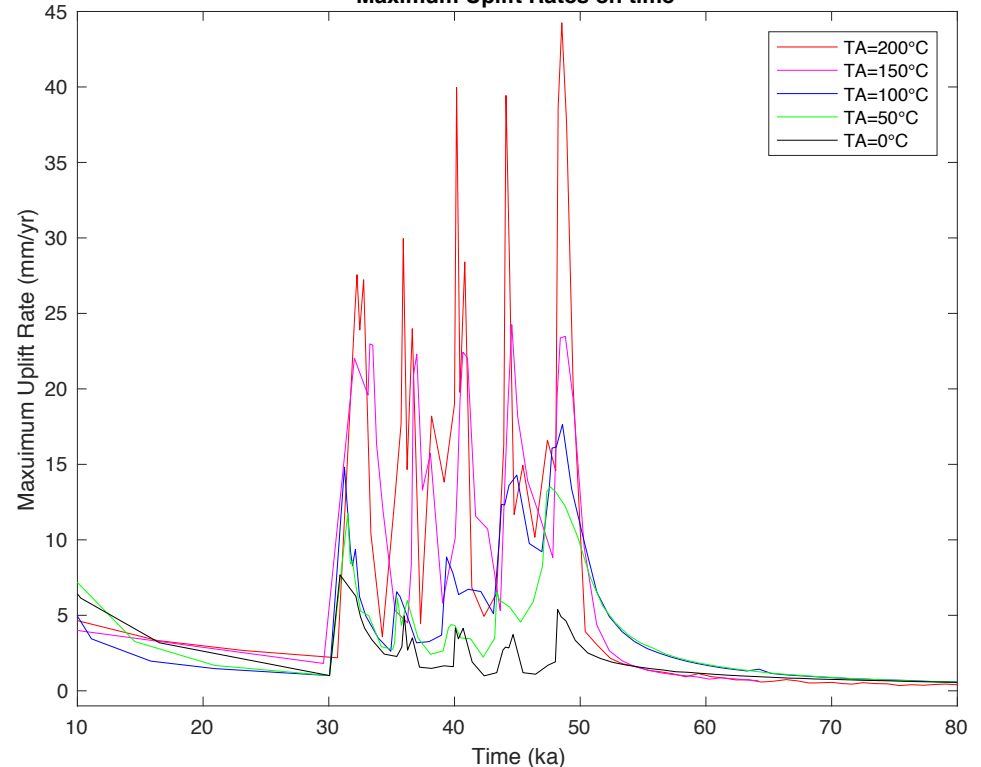

Supplement: Supplementary file [file egusphere-2023-1711-AC1-supplement.pdf]
