# Supplementary material for: Fast uplift in the Southern Patagonian Andes due to long and short term deglaciation and the asthenospheric window underneath
Source: Copernicus journal article supplement (doi:10.5194/egusphere-2023-1711), 2023-08-18
Supplement: Supplementary file [file egusphere-2023-1711-RC1-supplement.pdf]

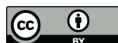

1 **Fast uplift in the Southern Patagonian Andes due to long and**  
2 **short term deglaciation and the asthenospheric window**  
3 **underneath**

4

5 Veleda A. P. Muller<sup>1</sup>, Pietro Sternai<sup>1</sup>, Christian Sue<sup>2,3</sup>

6 <sup>1</sup> Dipartimento di Scienze dell’Ambiente e della Terra (DISAT), Università degli Studi di  
7 Milano-Bicocca, Piazza della Scienza 4, Milan, Italy

8 <sup>2</sup> Institute des Sciences de la Terre (ISTerre), Université Grenoble Alpes, Université Savoie  
9 Mont Blanc, CNRS, IRD, IFSTTAR, Université Gustave Eiffel, Grenoble, France.

10 <sup>3</sup> Université de Franche Comté, Besançon, France.

11 *Correspondence to:* Veleda A.P. Muller (v.paivamuller@campus.unimib.it)

12

13

14 **Abstract.** An asthenospheric window underneath much of the South American continent  
15 increases the heat flow in the Southern Patagonian Andes, where glacial-interglacial cycles  
16 drive the building and melting of the Patagonian Icefields since the latest Miocene. The Last  
17 Glacial Maximum (LGM) was reached ~20000 years ago, and an acceleration of the  
18 deglaciation rate is recorded since the Little Ice Age (LIA), ~400 years ago. Fast uplift rates  
19 of up to  $41 \pm 3$  mm/yr are measured by GNSS around the Southern Patagonian Icefield and  
20 currently ascribed to post-LIA lithospheric rebound, but the possible longer-term post-LGM  
21 rebound is poorly constrained. These uplift rates, in addition, are one order of magnitude  
22 higher than those measured on other glaciated orogens (e.g., the European Alps), which raises  
23 questions about the role of the asthenospheric window in affecting the vertical surface  
24 displacement rates. Here, we perform geodynamic thermo-mechanical numerical modelling  
25 to estimate the surface uplift rates induced by post-LIA and post-LGM deglaciation  
26 accounting for temperature dependent rheologies and different thermal regimes in the  
27 asthenosphere. Our modelled maximum postglacial rebound matches the observed uplift rate  
28 budget only when both post-LIA and post-LGM deglaciation are accounted for and if a  
29 standard continental mantle potential temperature is increased by 150-200 °C. The  
30 asthenospheric window thus plays a key role in controlling the magnitude of presently  
31 observed uplift rates in the Southern Patagonian Andes.



## 32 1 Introduction

33 Vertical displacements of the Earth's surface with respect to the geoid occur in  
34 response to the motion of crustal and mantle rock masses due to plate tectonics and the  
35 associated redistribution of sediments, water, and ice by surface processes (e.g., Molnar and  
36 England, 1990; Watts, 2001; Champagnac et al., 2012; Sternai, 2023; Cloetingh et al., 2023).  
37 For instance, excess of topography in orogenic regions due to convergence and crustal  
38 stacking deflects the lithosphere downward, whereas unloading by erosion and ice melting  
39 causes upward deflection of the lithosphere, known as "isostatic" adjustment (e.g., Peltier and  
40 Andrews, 1976; Peltier, 1996, 2004; Mitrovica and Forte, 1997; Butler and Peltier, 2000;  
41 Kaufman and Lambeck, 2002; Watts, 2001; Turcotte and Schubert, 2002). The magnitude of  
42 surface uplift rates is set primarily by the lithosphere and asthenosphere viscosities, which  
43 depend, amongst other factors, on the thermal field at depth (McKenzie and Richter, 1981;  
44 McKenzie and Bickle, 1988; Gurnis, 1989; Ranalli, 1995, 1997; Kaufman et al., 1997; Watts,  
45 2001; Turcotte and Schubert, 2002). Although the theory that relates surface ice load changes  
46 and isostatic adjustment is well developed (e.g., Peltier and Andrews, 1976; Peltier, 1996,  
47 2004; Mitrovica and Forte, 1997; Kaufman and Lambeck, 2002; Stuhne and Peltier, 2015;  
48 Van der Wal et al., 2015), recognizing and quantifying expressions of such dynamics in  
49 natural settings is difficult.

50 The Southern Patagonian Andes in the South American Continent are located above a  
51 transition zone between the subducting Antarctic and Nazca plates and a wide asthenospheric  
52 window (Fig. 1a; Cande and Leslie, 1986). The Chile Triple Junction (CTJ) at  $\sim 46^\circ\text{S}$   
53 delimits the surface tip of the asthenospheric window, which opened during the last  $\sim 16$  Ma  
54 from south to north (Ramos and Kay, 1992; Breitsprecher and Thorkelson, 2009). First order  
55 effects of the asthenospheric flow on the surface continental geology are the inhibition of arc  
56 volcanism in favour of retroarc magmatism, forward propagation of the fold-and-thrust belt,  
57 and rock uplift (Ramos and Kay, 1992; Ramos, 2005; Breitsprecher and Thorkelson, 2009;  
58 Guillaume et al., 2009; Lagabrielle et al., 2010; Georgieva et al., 2016). Rock uplift due to  
59 asthenospheric upwelling, in particular, was estimated as  $< 0.15$  mm/yr in the last 3 Ma over  
60 an area of about  $100000$  km<sup>2</sup> around the CTJ latitude (Guillaume et al., 2009). The heat flow  
61 was calculated as  $>100$  mW/m<sup>2</sup> near the CTJ,  $\sim 70$ - $90$  mW/m<sup>2</sup> in the center of the  
62 asthenospheric window ( $\sim 50^\circ\text{S}$ ), and  $50$ - $60$  mW/m<sup>2</sup> near its northern boundary ( $\sim 46^\circ\text{S}$ )  
63 (Ávila and Dávila, 2018), suggesting that the mantle temperature beneath Southern Patagonia  
64 is likely higher than in normal subduction zones (Ranalli, 1997).

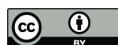

65 The Patagonian Ice Sheet covered the Southern Patagonian Andes between ~30000  
66 and ~17000 years ago, extending from latitudes 38 to 55 °S with estimated area of ~490000  
67 km<sup>2</sup> and volume of ~550000 km<sup>3</sup> (Fig. 1 a) based on preserved glacial geomorphologies,  
68 stratigraphic and paleoecological records, and geochronological data (Moreno et al., 1999,  
69 2005; McCulloch et al., 2000, 2005; Hulton et al., 2002; Rabassa, 2008; Glasser et al., 2005,  
70 2016; Glasser and Jansson, 2008; Hein et al., 2010; Boex et al., 2013; Bourgois et al., 2016;  
71 Martinod et al., 2016; Bendle et al., 2017; Thorndycraft et al., 2019; Davies et al., 2020). The  
72 average and maximum ice thickness were estimated as ~1100 m and ~2500 m, respectively  
73 (McCulloch et al., 2000; Hulton et al., 2002; Boex et al., 2013; Davies et al., 2020).  
74 Currently, the SPI covers an area of ~13219 km<sup>2</sup> with a volume of  $3632 \pm 675$  km<sup>3</sup>, whereas  
75 the Northern Patagonian Icefield (NPI) covers an area of ~3976 km<sup>2</sup> with a volume of  $1124 \pm$   
76  $260$  km<sup>3</sup> (Fig. 1). The present-day ice thickness reaches up to ~2000 m in deep glacial valleys  
77 (Millan et al., 2019). The long term ice loss rate is uncertain, but more than 75% of ice was  
78 certainly lost since the Last Glacial Maximum (LGM, approximately 20000 years ago), and  
79 some models predicted more than 95% of ice loss with separation between the SPI and NPI in  
80 the first 5000 to 10000 years of post-LGM deglaciation (McCulloch et al., 2000; Hulton et  
81 al., 2002; Boex et al., 2013; Bourgois et al., 2016; Thorndycraft et al., 2019; Davies et al.,  
82 2020).

83 GNSS and remote sensing data show ongoing vertical rock uplift rates between  $30 \pm 3$   
84 and  $41 \pm 3$  mm/yr in the northern part of the Southern Patagonian Icefield (SPI, Fig. 1b),  
85 gradually decreasing toward its peripheral parts (Aniya, 1996; Aniya et al., 1997; Rignot et  
86 al., 2003; Ivins and James, 1999, 2004; Dietrich et al., 2010; Willis et al., 2012; Lange et al.,  
87 2014). Such outstandingly high uplift rates are currently ascribed to lithospheric viscoelastic  
88 glacial isostatic adjustment (GIA) following the Little Ice Age (LIA), with apex around 1630  
89 AD (Ivins and James, 1999, 2004; Glasser et al., 2011). Deglaciation since the LIA was  
90 responsible for an ice loss of  $503 \pm 101.1$  km<sup>3</sup> in the SPI (Glasser et al., 2011), with a  
91 substantial increase of the glacial recession after the 20<sup>th</sup> century (Aniya, 1996; Aniya et al.,  
92 1997; Rignot et al., 2003; Glasser et al., 2011; Davies and Glasser, 2012; Ivins et al., 2011;  
93 Willis et al., 2012). To match the very high observed uplift rate budget, previous GIA studies  
94 infer low asthenosphere viscosity (in the order of  $10^{18}$  Pa s) and thin elastic lithosphere (~35  
95 km thick) (Ivins and James, 1999, 2004; Klemann et al., 2007; Dietrich et al., 2010; Lange et  
96 al., 2014). However, although this is consistent with abnormally high mantle temperatures,  
97 viscosity estimates from previous studies are untied to the regional thermal regime, which

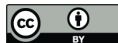

98 prevents a more thorough characterization of the role of the asthenospheric window  
99 underneath the SPI in affecting the observed uplift rates. In addition, the contribution of post-  
100 LGM deglaciation to present-day rock uplift rate was marginally addressed. Here, we  
101 perform fully coupled thermo-mechanical numerical geodynamic experiments forced by  
102 surface unloading scaled on post-LIA and post-LGM ice melting to evaluate their relative  
103 contribution to the observed regional uplift rates. Numerical experiments account for a range  
104 of positive thermal anomalies in the asthenosphere to further asses the role of the  
105 asthenospheric window in setting the mantle viscosity and associated postglacial rebound.  
106 Focusing on the magnitude, rather than the pattern, of the inferred surface uplift rates, we use  
107 the observed budget of rock uplift rate to constrain plausible thermal and viscosity structures  
108 at depth as well as the timing of postglacial rebound.  
109

## 110 2 Methodology

### 111 2.1 Numerical model

112 We use a fully coupled thermo-mechanical, visco-elasto-plastic, numerical  
113 geodynamic model to quantify the effect of thermal anomalies in the mantle on the magnitude  
114 of surface uplift rates due to deglaciation. We provide a short overview of the governing  
115 equations hereafter, while a detailed description of numerical technique can be found, for  
116 instance, in Gerya and Yuen (2007), Gerya et al. (2019), Sternai (2020), and Muller et al.  
117 (2022). The continuity equation allows for the conservation of mass during the displacement  
118 of a geological continuum:

$$119 \quad (1) \quad \frac{\partial \rho}{\partial t} + \nabla(\rho v) = 0$$

120 where  $\rho$  is the local density,  $t$  is time,  $v$  is the velocity vector, and  $\nabla$  is the divergence  
121 operator. The momentum equation describes the changes in velocity of an object in the  
122 gravity field due to internal and external forces:

$$123 \quad (2) \quad \frac{\partial \sigma_{ij}}{\partial x_i} + \rho g_i = \rho \left( \frac{\partial v_i}{\partial t} + v_j \frac{\partial v_i}{\partial x_j} \right)$$

124 where  $\sigma_{ij}$  is the stress tensor,  $x_i$  and  $x_j$  are spatial coordinates, and  $g_i$  is the  $i$ -th component of  
125 the gravity vector. The energy equation allows for the conservation of energy during  
126 advective and conductive heat transfer in the continuum:

$$127 \quad (3) \quad \rho C_p \frac{dT}{dt} - \text{div}(c \nabla T) + v \nabla T = H_r + H_s + H_a + H_t$$

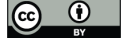

128 where  $P$  is pressure,  $T$  is temperature,  $C_p$  is specific heat capacity at a constant  $P$ ,  $c$  is the  
129 thermal conductivity,  $H_r + H_s + H_a + H_l$  are the volumetric heat productions by  
130 radiogenic, shear, adiabatic and latent heat, respectively.  $H_a \propto \frac{DP}{Dt}$ ,  $H_s = \sigma'_{ij} \dot{\epsilon}'_{ij(viscous)}$ , and  
131  $H_r$  and  $H_l$  are the radiogenic and latent heat productions.

132 Ductile deformation is thermally activated generating viscous flow, which involves  
133 diffusion and dislocation creep, calculated according to the material shear viscosity:

$$134 \quad (4) \quad \frac{1}{\eta_{ductile}} = \frac{1}{\eta_{diff}} + \frac{1}{\eta_{dist}}$$

135 with

$$136 \quad \eta_{diff} = \frac{\eta_0}{2\sigma_{cr}^{n-1}} \exp\left(\frac{E_a + PV_a}{RT}\right), \text{ and}$$

$$137 \quad \eta_{dist} = \frac{\eta_0^{\frac{1}{2}}}{2} \exp\left(\frac{E_a + PV_a}{nRT}\right) \dot{\epsilon}'_{II}{}^{\frac{1}{2}-1}$$

138 where  $\eta_{diff}$  and  $\eta_{dist}$  are the shear viscosity for diffusion and dislocation creep, respectively,  
139  $\eta_0$  is the material static viscosity,  $\sigma_{cr}$  is the diffusion-dislocation transition critical stress,  $n$   
140 is the stress exponent,  $E_a$  is the activation energy,  $V_a$  is the activation volume,  $R$  is the gas  
141 constant, and  $\dot{\epsilon}'_{II}$  is the second invariant of the strain rate tensor. The viscous deviatoric strain  
142 rate tensor,  $\dot{\epsilon}'_{ij(viscous)}$ , is defined by:

$$143 \quad (5) \quad \dot{\epsilon}'_{ij(viscous)} = \frac{1}{2\eta_{ductile}} \sigma'_{ij} + \delta_{ij} \eta_{bulk} \dot{\epsilon}_{kk} = \frac{1}{2\eta_{diff}} \sigma'_{ij} + \frac{1}{2\eta_{dist}} \sigma'_{ij} + \delta_{ij} \eta_{bulk} \dot{\epsilon}_{kk}$$

144 where  $\sigma'_{ij}$  is the deviatoric stress tensor,  $\delta_{ij}$  is the Kronecker delta,  $\dot{\epsilon}_{kk}$  is the volumetric  
145 strain rate (e.g., related to phase transformations), and  $\eta_{bulk}$  is the bulk viscosity.  
146 Recoverable deformation is defined by the elastic deviatoric strain rate tensor,  $\dot{\epsilon}'_{ij(elastic)}$ , as:

$$147 \quad (6) \quad \dot{\epsilon}'_{ij(elastic)} = \frac{1}{2\mu} \frac{\overset{\circ}{D}\sigma'_{ij}}{Dt}$$

148 where  $\mu$  is the shear modulus and  $\frac{\overset{\circ}{D}\sigma'_{ij}}{Dt}$  is the objective co-rotational time derivative of the  
149 deviatoric stress tensor. The plastic deformation, brittle and localised, occurs at low  
150 temperature when the absolute shear stress limit,  $\sigma_{yield}$ , is reached, with

$$151 \quad (7) \quad \sigma_{yield} = C + \sin(\varphi)P$$

152 where  $C$  is cohesion and  $\varphi$  is the effective internal friction angle. The plastic strain rate  
153 tensor,  $\dot{\epsilon}'_{ij(plastic)}$ , is defined as:

$$154 \quad (8) \quad \dot{\epsilon}'_{ij(plastic)} = 0 \text{ for } \sigma_{II} < \sigma_{yield}, \dot{\epsilon}'_{ij(plastic)} = \mathcal{X} \frac{\partial \sigma'_{ij}}{\partial \sigma_{II}} \text{ for } \sigma_{II} \geq \sigma_{yield}$$

155 where  $\mathcal{X}$  is the plastic multiplier which satisfies the plastic yielding condition  $\sigma_{II} = \sigma_{yield}$ .

156 The bulk strain rate tensor,  $\dot{\epsilon}'_{ij(bulk)}$ , integrates the viscous, elastic and plastic deformation:



157           (9)      $\dot{\epsilon}'_{ij(bulk)} = \dot{\epsilon}'_{ij(viscous)} + \dot{\epsilon}'_{ij(elastic)} + \dot{\epsilon}'_{ij(plastic)}$

158     **2.2 Reference model setup and modeling approach**

159           The model domain, scaled on the study region, is 700 km wide and 120 km thick.  
 160     From top to bottom, the model accounts for 10 km of ‘sticky’ air, 30 km of continental crust  
 161     (with rheology of quartzite, Ranalli, 1995), 30 km of lithospheric mantle, and 50 km of  
 162     asthenospheric mantle (with rheology of dry dunite, Ranalli, 1995), in agreement with  
 163     literature data (e.g., Klemann et al., 2007). The initial geotherm is piece-wise linear resulting  
 164     from an adiabatic temperature gradient of 0.5 °C/km in the asthenosphere (Turcotte and  
 165     Schubert, 2002) and thermal boundary conditions equal to 0 °C at the surface and 1327 °C at  
 166     the bottom of the lithosphere, with nil horizontal heat flux across the vertical boundaries. The  
 167     rheologic and thermal structure of the reference model give a lithospheric elastic thickness,  
 168     *Te* (*sensu* Burov and Diament, 1995), of ~30 km, comparable to previous estimates  
 169     underneath the SPI based on GIA models (Ivins and James, 1999; Dietrich et al., 2010; Lange  
 170     et al., 2014), heat flow data (Ávila and Dávila, 2018), and waveform inversion (Robertson  
 171     Maurice et al., 2003). Rocks rheological properties are listed in Table 1.

172           The numerical model uses the finite differences with marker-in-cell technique,  
 173     resolved by 51 × 61 nodes in x and y directions, respectively, distributed on a Eulerian grid  
 174     that accounts for a maximum resolution of 1 km along the y direction in the upper part of the  
 175     model domain, and ~13 km in the x direction. 400 × 400 Lagrangian markers are randomly  
 176     distributed along the x and y dimensions and used for advecting the material properties  
 177     (Gerya and Yuen, 2007; Gerya et al., 2019). The material properties carried by Lagrangian  
 178     markers are then interpolated onto the Eulerian grid via a 4<sup>th</sup> order Runge-Kutta interpolation  
 179     scheme. An internal free surface is simulated through the 10 km thick layer of sticky air. The  
 180     velocity boundary conditions are free slip at all boundaries (x = 0 and x = 700 km; y = 0 and  
 181     y = 120 km).

182           On the top of the crust and in the middle of the model domain we impose a 2 km thick  
 183     pseudo-icecap to simulate lithospheric unloading during deglaciation. The pseudo-icecap is  
 184     70 km wide for the post-LIA model set and 200 km wide for the post-LGM model sets (Fig. 2  
 185     a). We compute the surface load, *L*, as

186           (10)      $L = \rho_{ice} g h_{ice}$ ,

187     where  $\rho_{ice}$  is the pseudo-icecap density, *g* is the gravity acceleration, and *h<sub>ice</sub>* is the pseudo-  
 188     icecap thickness, and deglaciation occurs by gradually reducing *h<sub>ice</sub>* in time (Fig. 2 b, c). We  
 189     run two sets of experiments for the post-LGM deglaciation. In *Model set 1*, 75% of ice loss



190 occurs in 20000 years (i.e., 1500 m drop of ice thickness, Fig. 2 b), thus assuming a  
191 conservative estimate of ice loss since the beginning of the LGM until the present-day. In  
192 *Model set 2*, 95% of ice loss occurs in 10000 years (i.e., 1900 m drop of ice thickness, Fig. 2  
193 b), assuming faster deglaciation rates of the Patagonian Ice Sheet in the first half of post-  
194 LGM deglaciation (McCulloch et al., 2000; Hulton et al., 2002; Boex et al., 2013; Bendle et  
195 al., 2017; Thorndycraft et al., 2019; Davies et al., 2020). For the post-LIA deglaciation, we  
196 simulate 10% of ice loss in 400 years (i.e., 200 m drop of ice thickness, Fig. 2 c) (Aniya,  
197 1996; Aniya et al., 1997; Rignot et al., 2003; Ivins and James, 1999, 2004; Dietrich et al.,  
198 2010; Willis et al., 2012; Lange et al., 2014).

199 In the models the initial lateral extent of the pseudo-icecap does not change  
200 throughout the deglaciation. Although this simplification may affect the inferred pattern of  
201 postglacial rebound, it greatly facilitates the simulation of deglacial lithospheric unloading  
202 without significantly affecting the magnitude of postglacial rebound, which is the main focus  
203 here. All simulations account for some spin up time before the deglaciation begins, so that the  
204 lithosphere-asthenosphere system adjusts to the pseudo-icecap initial load. The surface uplift  
205 rate during the deglaciation is calculated through time as the surface elevation change  
206 resulting from the modelled strain field divided by the viscoelastic timestep. Given the  
207 geologically short time window investigated here, we neglect deformation related to longer  
208 term tectonic forces. The parametric study focuses on the mantle potential temperature (*sensu*  
209 McKenzie and Bickle, 1988) which accounts for positive thermal anomalies, TA, of up to  
210 200 °C in steps of 50 °C, added to the reference mantle potential temperature of 1265 °C  
211 (McKenzie and Bickle, 1988; Currie and Hyndman, 2006; Ávila and Dávila, 2018; Sternai,  
212 2020) to mimic the presence of a slab window at depth.



### 213 3 Results

214 Results are shown in Table 2 and Figs. 4-7. In agreement with the theory of  
215 lithospheric flexure (e.g., Turcotte and Schubert, 2002) the deglaciation triggers uplift in the  
216 region covered by the melting pseudo-icecap and subsidence in the neighbouring regions  
217 (Figs. 4-6). Overall, increasing the mantle potential temperature decreases the asthenospheric  
218 viscosity, with significant effects on the magnitude of the modelled surface velocity field.  
219 The asthenosphere viscosity ranges between  $10^{22}$ - $10^{19}$  Pa s in simulations with TA equal to 0  
220 (reference model), 50 and 100 °C, and between  $10^{19}$ - $10^{16}$  Pa s in simulations with TA equal  
221 to 150 and 200 °C (Fig. 3 a-d). Lithospheric warming due to increasing mantle potential  
222 temperature also leads to a reduction of the lower lithosphere viscosity (from  $10^{22}$  to  $10^{20}$  Pa  
223 s), thereby decreasing the integrated lithospheric strength.

224 In *Model set 1* for Post-LGM deglaciation, when TA is 0 (reference model) the  
225 maximum uplift rates is < 1 mm/yr during the first 5000 years of the deglaciation, increasing  
226 gradually up to 9.5 mm/yr in the later stages of the deglaciation (i.e., 20000 years, Fig. 4).  
227 When TA equals 50, 100, 150 and 200 °C, the maximum uplift rates can reach up to ~2, ~5,  
228 ~12, and ~15 mm/yr, respectively, already in the first 1000 years of the deglaciation (Fig. 4  
229 a). When TA is 50 and 100 °C the maximum uplift rate is subject to a protracted increase in  
230 time, reaching up to ~12 and ~14 mm/yr after 20000 years of deglaciation (Figs. 4 b-d and 7  
231 a). For TA equal to 150 and 200 °C, the maximum uplift rate reach a plateau between 11 and  
232 17 mm/yr during the 20000 years of deglaciation (Figs. 4 and 7 a, Table 2). After the end of  
233 the deglaciation, the maximum uplift rate takes longer than about 5000 years to re-equilibrate  
234 to 0 mm/yr when  $TA \leq 100$  °C, whereas it drops to 0 mm/yr almost immediately when TA is  
235 150 or 200 °C (Fig. 7 a).

236 In the *Model set 2* for Post-LGM deglaciation, the maximum uplift rate is less than 2  
237 mm/yr during the first 1000 years of deglaciation when TA is 0, 50 and 100 °C, whereas it  
238 reaches up to ~22 and ~30 mm/yr during in the first 1000 years of deglaciation when TA is  
239 150 and 200 °C (Fig. 5 a, 7 b, and Table 2). Between 5000 and 10000 years of deglaciation,  
240 the maximum uplift rate increases to ~19, ~25 and ~36 mm/yr, respectively when TA is 0, 50  
241 and 100 °C, whereas it reach up to between 36 and 41 mm/yr between 50000 and 1000 years  
242 of deglaciation when TA equal to 150 and 200 °C. The maximum uplift rate decreases slower  
243 if TA is 0, 50 and 100 °C, taking longer than 5000 year after the deglaciation to drop to  
244 values <5 mm/yr (Fig. 7 b and Table 2), whereas it quickly drops to < 2 mm/yr when the  
245 deglaciation is over and TA is 150 and 200°C (Figs. 5 b-d and 7b). Overall, a warmer and





246 less viscous asthenosphere generates a higher magnitude and fast changing postglacial  
247 rebound than a cooler and more viscous asthenosphere.

248 In the post-LIA model set, the maximum uplift rate is  $\sim 1.4$ ,  $\sim 2.3$  and  $\sim 2.2$  mm/yr  
249 during the first 100 years of deglaciation when TA is respectively 0, 50, and 100 °C, whereas  
250 it reaches  $\sim 8.3$  and  $\sim 23$  mm/yr during the same interval when TA is respectively 150 and 200  
251 °C (Figs. 6 a, 7 c, and Table 2). Between 200 and 400 years of deglaciation, the maximum  
252 uplift rate reaches  $\sim 1.9$ ,  $\sim 2.5$  and  $\sim 3$  mm/yr when TA equal to 0, 50 and 100 °C, and  $\sim 14$  and  
253  $\sim 25.5$  mm/yr when TA is 150 and 200 °C, respectively (Figs. 6 c-d, 7 c, and Table 2). When  
254 the deglaciation ends, the maximum uplift rate drops to  $\sim 0$  mm/yr in  $\sim 100$  years when TA  $\leq$   
255 100 °C, whereas it takes longer than 1000 years when TA equals 150 °C or 200 °C (Fig. 7 c).  
256 Overall, a warmer and less viscous asthenosphere generates a higher magnitude postglacial  
257 rebound which, however, takes much longer to re-equilibrate to 0 mm/yr after the end of the  
258 deglaciation than a cooler and more viscous asthenosphere.

259

#### 260 **4 Discussion and conclusions**

261 Our modelling is simplistic in that we impose a linear and uniform ice loss instead of  
262 a more realistic ice-sheet melting pattern in space and time. This choice is motivated by the  
263 limited data reporting on the SPI melting velocities and associated redistribution of the  
264 surface masses, which cover time spans much shorter than the post-LIA and post-LGM time  
265 windows investigated here (Aniya, 1996; Aniya et al., 1997; Rignot et al., 2003; Ivins and  
266 James, 1999, 2004; Willis et al., 2012; Dietrich et al., 2010; Lange et al., 2014). As  
267 previously highlighted (Hulton et al., 2002; Rabassa, 2008; Glasser et al., 2011; Davis and  
268 Glasser, 2012; Martinod et al., 2016; Bendle et al., 2017; Davies et al., 2020), constraints  
269 regarding the ice-sheet mass balance and melting velocities throughout the time windows of  
270 interest are difficult to obtain from the preserved geomorphological, stratigraphic and  
271 geochronological records. We also assume a homogeneous lithosphere and neglect lateral  
272 viscosity variations in the asthenosphere (Klemann et al., 2007) despite the long-term  
273 southern Andean orogenic history (Cande and Leslie, 1986; Ramos, 2005; Muller et al.,  
274 2021). Notwithstanding these limitations, however, our fully coupled numerical thermo-  
275 mechanical geodynamic models provide realistic uplift rates that one can compare to current  
276 geodetic observations. Following the example of previous studies (Ivins and James, 1999,  
277 2004; Klemann et al., 2007; Dietrich et al., 2010; Lange et al., 2014), we discuss our results  
278 assuming that GNSS-measured rock uplift rates are mostly related to the deglaciation history



279 and only marginally controlled by the longer term geodynamics (e.g., Ramos, 2005; Muller et  
280 al., 2021).

281 We first remark that inferred maximum post-LIA uplift rate of up to a few mm/yr  
282 from experiments without or with a low asthenospheric thermal anomaly ( $TA \leq 100$  °C) are  
283 within the same order of magnitude of maximum uplift rates measured in collisional orogens  
284 such as the European Alps (Sue et al., 2007; Serpelloni et al., 2013; Walpersdorf et al., 2015;  
285 Sternai et al., 2019) and the Himalayas (Larson et al., 1999). Since these collisional orogens  
286 are characterized by a thicker lithosphere (Geissler et al., 2010; Ravikumar et al., 2020), they  
287 are likely less sensitive to mantle dynamics than the Southern Patagonian Andes. When we  
288 consider lithospheric unloading due to post-LGM deglaciation of a wider ice sheet, however,  
289 the inferred maximum uplift rate via *Model set 1* and *Model set 2* reaches up to 10 mm/yr for  
290 and 20 mm/yr, respectively, even without asthenospheric thermal anomaly. This suggests a  
291 that a contribution from long-term postglacial rebound to the present-day uplift rates  
292 measured in the SPI is likely.

293 In the Southern Patagonian Andes, the regional asthenosphere viscosity was estimated  
294 between  $1.6$  and  $8 \times 10^{18}$  Pa s from GIA models based on GNSS and satellite observations  
295 (Ivins and James, 1999, 2004; Klemann et al., 2007; Dietrich et al., 2010; Willis et al., 2012;  
296 Lange et al., 2014). Similarly, the asthenosphere viscosity from our models when  $TA > 100$   
297 °C is  $< 10^{19}$  Pa s, with the lowest viscosity value of  $10^{16}$  Pa s imposed where partial melting,  
298 supported by the regional Holocene volcanism (Stern and Kilian, 1996), occurs. Under these  
299 conditions, however, our experiments provide uplift rates between 14 and 26 mm/yr for post-  
300 LIA deglaciation indicating that, even with a very low viscosity asthenosphere, the rebound  
301 due to the short-term post-LIA deglaciation does not reach the presently observed maximum  
302 uplift rates of  $41 \pm 3$  mm/yr. Experiments that account for a low viscosity asthenosphere and  
303 long-term post-LGM deglaciation lasting for 20000 years and 10000 years reach up to  $\sim 25$   
304 and  $\sim 42$  mm/yr of uplift rate, respectively, comparable to present-day values. Results,  
305 therefore, indicate that the outstanding observational budget of rock uplift in the SPI is  
306 matched only when accounting for higher-than-normal mantle temperatures, thereby  
307 highlighting the relevance of the regional asthenospheric window.

308 Because of the limited knowledge regarding the timing and amount of ice loss since  
309 the LGM (e.g., Davies et al., 2020), it is difficult to position in time present-day uplift rate  
310 measurements within the investigated deglaciation scenarios to assess the contribution of  
311 post-LGM and post-LIA deglaciation to the maximum uplift rate budget. In the faster post-  
312 LGM deglaciation scenario (*Model set 2*) the observed maximum uplift rate budget is



313 attained in about 10000 years of deglaciation, but only minor residual rebound could be  
314 observed today regardless of the amount of ice loss (Fig. 7 b). If post-LGM deglaciation  
315 occurred slower (*Model set 1*), this event may contribute to up to 40% to the present-day  
316 uplift rate budget. Although it is difficult to reconcile this scenario with the geomorphological  
317 and geochronological evidences (Hulton et al., 2002; Boex et al., 2013; Davis and Glasser,  
318 2012; Martinod et al., 2016; Bendle et al., 2017; Thorndycraft et al., 2019; Davies et al.,  
319 2020), it appears that post-LIA rebound alone cannot cover the entire budget of the observed  
320 uplift rates even with the highest tested TA, which points to a non-negligible contribution  
321 from post-LGM deglaciation. This latter conclusion is reinforced by estimates of the mantle  
322 relaxation time,  $\tau_r$ , as (Turcotte and Schubert, 2002):

$$323 \quad (11) \quad \tau_r = \frac{4\pi\nu}{g\lambda},$$

324 where  $\nu$  is the asthenosphere viscosity,  $\lambda$  is the width of the ice sheet, and  $g$  is the  
325 gravity acceleration. Using  $10^{16} < \nu < 10^{18}$  Pa s and  $\lambda = 200$  km leads to  $\sim 2000 < \tau_r < \sim 200000$   
326 years, a time range considerably longer than the post-LIA deglaciation and including full  
327 Pleistocene glacial-interglacial cycles (Ruddiman et al., 1986). We therefore propose that  
328 currently observed uplift rates in the Southern Andes are driven by both post-LGM and post  
329 LIA lithospheric rebound enhanced by a thermal anomaly of at least 150 °C due to the  
330 regional asthenospheric window which lowers mantle viscosities.

331 As a final consideration, our models suggest that we shall measure regional uplift  
332 rates in the order of the tens of cm/yr in the next century if the currently observed ice loss rate  
333 of at least -20 Gt/yr in the SPI (Willis et al., 2012) will continue until the total meltdown of  
334 the ice sheet in  $\sim 200$  years.

335

## 336 **5 Acknowledgements**

337

338 This work was supported by the Italian Ministry of Education, MUR (Project  
339 Dipartimenti di Eccellenza 2023-2027, TECLA, Department of Earth and Environmental  
340 Sciences, University of Milano-Bicocca), and the Fondazione Cariplo and Fondazione CDP  
341 (Grant n° 2022 – 1546\_001). The Université Grenoble Alpes and the French CNRS also  
342 supported this work.

343

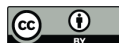

344 **References**

- 345 Aniya, M. (1996). Holocene variations of Ameghino glacier, southern Patagonia. *The*  
346 *Holocene*, 6(2), 247-252.
- 347 Aniya, M., Sato, H., Naruse, R., Skvarca, P., & Casassa, G. (1997). Recent glacier variations  
348 in the Southern Patagonia icefield, South America. *Arctic and Alpine Research*, 29(1), 1-12.
- 349 Ávila, P., & Dávila, F. M. (2018). Heat flow and lithospheric thickness analysis in the  
350 Patagonian asthenospheric windows, southern South America. *Tectonophysics*, 747, 99-107.
- 351 Bendle, J. M., Palmer, A. P., Thorndycraft, V. R., & Matthews, I. P. (2017). High-resolution  
352 chronology for deglaciation of the Patagonian Ice Sheet at Lago Buenos Aires (46.5 S)  
353 revealed through varve chronology and Bayesian age modelling. *Quaternary Science*  
354 *Reviews*, 177, 314-339.
- 355 Boex, J., Fogwill, C., Harrison, S., Glasser, N. F., Hein, A., Schnabel, C., & Xu, S. (2013).  
356 Rapid thinning of the late Pleistocene Patagonian Ice Sheet followed migration of the  
357 Southern Westerlies. *Scientific Reports*, 3(1), 1-6.
- 358 Bourgois, J., Cisternas, M. E., Braucher, R., Bourlès, D., & Frutos, J. (2016). Geomorphic  
359 records along the general Carrera (Chile)–Buenos Aires (Argentina) glacial lake (46–48 S),  
360 climate inferences, and glacial rebound for the past 7–9 ka. *The Journal of Geology*, 124(1),  
361 27-53.
- 362 Breitsprecher, K., & Thorkelson, D. J. (2009). Neogene kinematic history of Nazca–  
363 Antarctic–Phoenix slab windows beneath Patagonia and the Antarctic Peninsula.  
364 *Tectonophysics*, 464(1-4), 10-20.
- 365 Burov, E. B., & Diament, M. (1995). The effective elastic thickness ( $T_e$ ) of continental  
366 lithosphere: What does it really mean?. *Journal of Geophysical Research: Solid Earth*,  
367 100(B3), 3905-3927.
- 368 Butler, S. L., & Peltier, W. R. (2000). On scaling relations in time-dependent mantle  
369 convection and the heat transfer constraint on layering. *Journal of Geophysical Research:*  
370 *Solid Earth*, 105(B2), 3175-3208.
- 371 Cande, S. C., & Leslie, R. B. (1986). Late Cenozoic tectonics of the southern Chile trench.  
372 *Journal of Geophysical Research: Solid Earth*, 91(B1), 471-496.
- 373 Champagnac, J. D., Molnar, P., Sue, C., & Herman, F. (2012). Tectonics, climate, and  
374 mountain topography. *Journal of Geophysical Research: Solid Earth*, 117(B2).
- 375 Cloetingh, S., Sternai, P., Koptev, A., Ehlers, T. A., Gerya, T., Kovács, I., Oerlemans, J.,  
376 Beekman, F., Lavallée, Y., Dingwell, D., Békési, E., Porkoláb, K., Tesauro, M., Lavecchia,  
377 A., Botsyun, S., Muller, V., Roure, F., Serpelloni, E., Matenco, L., Castelltort, S.,  
378 Giovannelli, D., Brovarone, A.V., Malaspina, N., Coletti, G., Valla, P., & Limberger, J.  
379 (2023). Coupled surface to deep Earth processes: Perspectives from TOPO-EUROPE with an  
380 emphasis on climate-and energy-related societal challenges. *Global and Planetary Change*,  
381 104140.
- 382 Currie, C. A., & Hyndman, R. D. (2006). The thermal structure of subduction zone back arcs.  
383 *Journal of Geophysical Research: Solid Earth*, 111(B8).
- 384 Davies, B. J., & Glasser, N. F. (2012). Accelerating shrinkage of Patagonian glaciers from the  
385 Little Ice Age (~ AD 1870) to 2011. *Journal of Glaciology*, 58(212), 1063-1084.
- 386 Davies, B. J., Darvill, C. M., Lovell, H., Bendle, J. M., Dowdeswell, J. A., Fabel, D., García,



- 387 J.-L., Geiger, A., Glasser, N.F., Gheorghiu, D.M., Harrison, S., Hein, A.S., Kaplan, M.R.,  
388 Martin, J.R.V., Mendelova, M., Palmer, A., Pelto, M., Rodés, A., Segredo, E.A., Smedley,  
389 R.K., Smellie J., & Thorndycraft, V. R. (2020). The evolution of the Patagonian Ice Sheet  
390 from 35 ka to the present day (PATICE). *Earth-Science Reviews*, 204, 103152.
- 391 Dietrich, R., Ivins, E. R., Casassa, G., Lange, H., Wendt, J., & Fritsche, M. (2010). Rapid  
392 crustal uplift in Patagonia due to enhanced ice loss. *Earth and Planetary Science Letters*,  
393 289(1-2), 22-29.
- 394 Geissler, W. H., Sodoudi, F., & Kind, R. (2010). Thickness of the central and eastern  
395 European lithosphere as seen by S receiver functions. *Geophysical Journal International*,  
396 181(2), 604-634.
- 397 Georgieva, V., Melnick, D., Schildgen, T. F., Ehlers, T. A., Lagabriele, Y., Enkelmann, E.,  
398 & Strecker, M. R. (2016). Tectonic control on rock uplift, exhumation, and topography above  
399 an oceanic ridge collision: Southern Patagonian Andes (47 S), Chile. *Tectonics*, 35(6), 1317-  
400 1341.
- 401 Gerya, T. (2019). *Introduction to numerical geodynamic modelling*. Cambridge University  
402 Press.
- 403 Gerya, T. V., & Yuen, D. A. (2007). Robust characteristics method for modelling multiphase  
404 visco-elasto-plastic thermo-mechanical problems. *Physics of the Earth and Planetary  
405 Interiors*, 163(1-4), 83-105.
- 406 Glasser, N. F., Harrison, S., Jansson, K. N., Anderson, K., & Cowley, A. (2011). Global sea-  
407 level contribution from the Patagonian Icefields since the Little Ice Age maximum. *Nature  
408 Geoscience*, 4(5), 303-307.
- 409 Glasser, N. F., Jansson, K. N., Harrison, S., & Rivera, A. (2005). Geomorphological evidence  
410 for variations of the North Patagonian Icefield during the Holocene. *Geomorphology*, 71(3-  
411 4), 263-277.
- 412 Glasser, N., & Jansson, K. (2008). The glacial map of southern South America. *Journal of  
413 Maps*, 4(1), 175-196.
- 414 Glasser, N. F., Jansson, K. N., Duller, G. A., Singarayer, J., Holloway, M., & Harrison, S.  
415 (2016). Glacial lake drainage in Patagonia (13-8 kyr) and response of the adjacent Pacific  
416 Ocean. *Scientific reports*, 6(1), 21064.
- 417 Guillaume, B., Martinod, J., Husson, L., Roddaz, M., & Riquelme, R. (2009). Neogene uplift  
418 of central eastern Patagonia: dynamic response to active spreading ridge subduction?.  
419 *Tectonics*, 28(2).
- 420 Gurnis, M. (1989). A reassessment of the heat transport by variable viscosity convection with  
421 plates and lids. *Geophysical Research Letters*, 16(2), 179-182.
- 422 Hein, A. S., Hulton, N. R., Dunai, T. J., Sugden, D. E., Kaplan, M. R., & Xu, S. (2010). The  
423 chronology of the Last Glacial Maximum and deglacial events in central Argentine  
424 Patagonia. *Quaternary Science Reviews*, 29(9-10), 1212-1227.
- 425 Hirschmann, M. M. (2000). Mantle solidus: Experimental constraints and the effects of  
426 peridotite composition. *Geochemistry, Geophysics, Geosystems*, 1(10).
- 427 Hulton, N. R., Purves, R. S., McCulloch, R. D., Sugden, D. E., & Bentley, M. J. (2002). The  
428 last glacial maximum and deglaciation in southern South America. *Quaternary Science  
429 Reviews*, 21(1-3), 233-241.
- 430 Ivins, E. R., & James, T. S. (1999). Simple models for late Holocene and present-day



- 431 Patagonian glacier fluctuations and predictions of a geodetically detectable isostatic response.  
432 *Geophysical Journal International*, 138(3), 601-624.
- 433 Ivins, E. R., & James, T. S. (2004). Bedrock response to Llanquihue Holocene and present-  
434 day glaciation in southernmost South America. *Geophysical Research Letters*, 31(24).
- 435 Ivins, E. R., Watkins, M. M., Yuan, D. N., Dietrich, R., Casassa, G., & Rülke, A. (2011). On-  
436 land ice loss and glacial isostatic adjustment at the Drake Passage: 2003–2009. *Journal of*  
437 *Geophysical Research: Solid Earth*, 116(B2).
- 438 Johannes, W. (1985). The significance of experimental studies for the formation of  
439 migmatites. In: *Migmatites*, Ed. Ashworth, J. R. Blackie & Son Ltd, USA Chapman & Hall.
- 440 Kaufmann, G., & Lambeck, K. (2002). Glacial isostatic adjustment and the radial viscosity  
441 profile from inverse modeling. *Journal of Geophysical Research: Solid Earth*, 107(B11),  
442 ETG-5.
- 443 Kaufmann, G., Wu, P., & Wolf, D. (1997). Some effects of lateral heterogeneities in the  
444 upper mantle on postglacial land uplift close to continental margins. *Geophysical Journal*  
445 *International*, 128(1), 175-187.
- 446 Klemann, V., Ivins, E. R., Martinec, Z., & Wolf, D. (2007). Models of active glacial isostasy  
447 roofing warm subduction: Case of the South Patagonian Ice Field. *Journal of Geophysical*  
448 *Research: Solid Earth*, 112(B9).
- 449 Lagabriele, Y., Scalabrino, B., Suarez, M., & Ritz, J. F. (2010). Mio-Pliocene glaciations of  
450 Central Patagonia: New evidence and tectonic implications. *Andean Geology*, 37(2), 276-299.
- 451 Lange, H., Casassa, G., Ivins, E. R., Schröder, L., Fritsche, M., Richter, A., Groh, A., &  
452 Dietrich, R. (2014). Observed crustal uplift near the Southern Patagonian Icefield constrains  
453 improved viscoelastic Earth models. *Geophysical Research Letters*, 41(3), 805-812.
- 454 Larson, K. M., Bürgmann, R., Bilham, R., & Freymueller, J. T. (1999). Kinematics of the  
455 India-Eurasia collision zone from GPS measurements. *Journal of Geophysical Research:*  
456 *Solid Earth*, 104(B1), 1077-1093.
- 457 Martinod, J., Pouyaud, B., Carretier, S., Guillaume, B., & Hérail, G. (2016). Geomorphic  
458 Records along the General Carrera (Chile)–Buenos Aires (Argentina) Glacial Lake (46°–48°  
459 S), Climate Inferences, and Glacial Rebound for the Past 7–9 ka: A discussion. *The Journal*  
460 *of Geology*, 124(5), 631-635.
- 461 McCulloch, R. D., Bentley, M. J., Purves, R. S., Hulton, N. R., Sugden, D. E., & Clapperton,  
462 C. M. (2000). Climatic inferences from glacial and palaeoecological evidence at the last  
463 glacial termination, southern South America. *Journal of Quaternary Science: Published for*  
464 *the Quaternary Research Association*, 15(4), 409-417.
- 465 McCulloch, R. D., Fogwill, C. J., Sugden, D. E., Bentley, M. J., & Kubik, P. W. (2005).  
466 Chronology of the last glaciation in central Strait of Magellan and Bahía Inútil, southernmost  
467 South America. *Geografiska Annaler: Series A, Physical Geography*, 87(2), 289-312.
- 468 McKenzie, D. A. N., & Bickle, M. J. (1988). The volume and composition of melt generated  
469 by extension of the lithosphere. *Journal of petrology*, 29(3), 625-679.
- 470 McKenzie, D., & Richter, F. M. (1981). Parameterized thermal convection in a layered region  
471 and the thermal history of the Earth. *Journal of Geophysical Research: Solid Earth*, 86(B12),  
472 11667-11680.
- 473 Moreno, P. I., Lowell, T. V., Jacobson Jr, G. L., & Denton, G. H. (1999). Abrupt vegetation

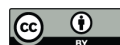

- 474 and climate changes during the last glacial maximum and last termination in the Chilean Lake  
475 District: a case study from Canal de la Puntilla (41 S). *Geografiska Annaler: Series A,*  
476 *Physical Geography*, 81(2), 285-311.
- 477 Millan, R., Rignot, E., Rivera, A., Martineau, V., Mouginot, J., Zamora, R., Uribe, J.,  
478 Lenzano, G., De Fleurian, B., Li, X., Gim, Y., & Kirchner, D. (2019). Ice thickness and bed  
479 elevation of the Northern and Southern Patagonian Icefields. *Geophysical Research Letters*,  
480 46(12), 6626-6635.
- 481 Mitrovica, J. X., & Forte, A. M. (1997). Radial profile of mantle viscosity: Results from the  
482 joint inversion of convection and postglacial rebound observables. *Journal of Geophysical*  
483 *Research: Solid Earth*, 102(B2), 2751-2769.
- 484 Molnar, P., & England, P. (1990). Late Cenozoic uplift of mountain ranges and global  
485 climate change: chicken or egg? *Nature*, 346(6279), 29-34.
- 486 Moreno, P. I., Denton, G. H., Moreno, H., Lowell, T. V., Putnam, A. E., & Kaplan, M. R.  
487 (2015). Radiocarbon chronology of the last glacial maximum and its termination in  
488 northwestern Patagonia. *Quaternary Science Reviews*, 122, 233-249.
- 489 Muller, V. A., Calderón, M., Fosdick, J. C., Ghiglione, M. C., Cury, L. F., Massonne, H. J.,  
490 Fanning, M.C., Warren, C.J., Ramírez de Arellano, C., & Sternai, P. (2021). The closure of  
491 the Rocas Verdes Basin and early tectono-metamorphic evolution of the Magallanes Fold-  
492 and-Thrust Belt, southern Patagonian Andes (52–54° S). *Tectonophysics*, 798, 228686.
- 493 Muller, V. A., Sternai, P., Sue, C., Simon-Labric, T., & Valla, P. G. (2022). Climatic control  
494 on the location of continental volcanic arcs. *Scientific Reports*, 12(1), 1-13.
- 495 Peltier, W. R. (1996). Mantle viscosity and ice-age ice sheet topography. *Science*, 273(5280),  
496 1359-1364.
- 497 Peltier, W. R. (2004). Global glacial isostasy and the surface of the ice-age Earth: the ICE-5G  
498 (VM2) model and GRACE. *Annu. Rev. Earth Planet. Sci.*, 32, 111-149.
- 499 Peltier, W. R., & Andrews, J. T. (1976). Glacial-isostatic adjustment—I. The forward  
500 problem. *Geophysical Journal International*, 46(3), 605-646.
- 501 Rabassa, J. (2008). Late cenozoic glaciations in Patagonia and Tierra del Fuego.  
502 *Developments in quaternary sciences*, 11, 151-204.
- 503 Ramos, V. A. (2005). Seismic ridge subduction and topography: Foreland deformation in the  
504 Patagonian Andes. *Tectonophysics*, 399(1-4), 73-86.
- 505 Ramos, V. A., & Kay, S. M. (1992). Southern Patagonian plateau basalts and deformation:  
506 backarc testimony of ridge collisions. *Tectonophysics*, 205(1-3), 261-282.
- 507 Ranalli, G. (1995). *Rheology of the Earth*. Springer Science & Business Media.
- 508 Ranalli, G. (1997). Rheology of the lithosphere in space and time. *Geological Society,*  
509 *London, Special Publications*, 121(1), 19-37.
- 510 Ravikumar, M., Singh, B., Pavan Kumar, V., Satyakumar, A. V., Ramesh, D. S., & Tiwari,  
511 V. M. (2020). Lithospheric density structure and effective elastic thickness beneath Himalaya  
512 and Tibetan Plateau: Inference from the integrated analysis of gravity, geoid, and topographic  
513 data incorporating seismic constraints. *Tectonics*, 39(10), e2020TC006219.
- 514 Rignot, E., Rivera, A., & Casassa, G. (2003). Contribution of the Patagonia Icefields of South  
515 America to sea level rise. *Science*, 302(5644), 434-437.
- 516 Robertson Maurice, S. D., Wiens, D. A., Koper, K. D., & Vera, E. (2003). Crustal and upper



- 517 mantle structure of southernmost South America inferred from regional waveform inversion.  
518 *Journal of Geophysical Research: Solid Earth*, 108(B1).
- 519 Ruddiman, W. F., Raymo, M., & McIntyre, A. (1986). Matuyama 41,000-year cycles: North  
520 Atlantic Ocean and northern hemisphere ice sheets. *Earth and Planetary Science Letters*,  
521 80(1-2), 117-129.
- 522 Serpelloni, E., Faccenna, C., Spada, G., Dong, D., & Williams, S. D. (2013). Vertical GPS  
523 ground motion rates in the Euro-Mediterranean region: New evidence of velocity gradients at  
524 different spatial scales along the Nubia-Eurasia plate boundary. *Journal of Geophysical  
525 Research: Solid Earth*, 118(11), 6003-6024.
- 526 Stern, C. R., & Kilian, R. (1996). Role of the subducted slab, mantle wedge and continental  
527 crust in the generation of adakites from the Andean Austral Volcanic Zone. *Contributions to  
528 mineralogy and petrology*, 123, 263-281.
- 529 Sternai, P. (2020). Surface processes forcing on extensional rock melting. *Scientific reports*,  
530 10(1), 1-13.
- 531 Sternai, P. (2023). Feedbacks between internal and external Earth dynamics. In *Dynamics of  
532 Plate Tectonics and Mantle Convection* (pp. 271-294). Elsevier.
- 533 Sternai, P., Sue, C., Husson, L., Serpelloni, E., Becker, T. W., Willett, S. D., Faccenna, C., Di  
534 Giulio, A., Spada, G., Jolivet, L., Valla, P., Petit, C., Nocquet, J.-M., Walpersdorf, A., &  
535 Castellort, S. (2019). Present-day uplift of the European Alps: Evaluating mechanisms and  
536 models of their relative contributions. *Earth-Science Reviews*, 190, 589-604.
- 537 Stuhne, G. R., & Peltier, W. R. (2015). Reconciling the ICE-6G\_C reconstruction of glacial  
538 chronology with ice sheet dynamics: The cases of Greenland and Antarctica. *Journal of  
539 Geophysical Research: Earth Surface*, 120(9), 1841-1865.
- 540 Sue, C., Delacou, B., Champagnac, J. D., Allanic, C., & Burkhard, M. (2007). Aseismic  
541 deformation in the Alps: GPS vs. seismic strain quantification. *Terra Nova*, 19(3), 182-188.
- 542 Thorndycraft, V. R., Bendle, J. M., Benito, G., Davies, B. J., Sancho, C., Palmer, A. P.,  
543 Fabel, D., Medialdea, A., & Martin, J. R. (2019). Glacial lake evolution and Atlantic-Pacific  
544 drainage reversals during deglaciation of the Patagonian Ice Sheet. *Quaternary Science  
545 Reviews*, 203, 102-127.
- 546 Turcotte, D. L., & Schubert, G. (2002). *Geodynamics*. Cambridge university press.
- 547 van der Wal, W., Whitehouse, P. L., & Schrama, E. J. (2015). Effect of GIA models with 3D  
548 composite mantle viscosity on GRACE mass balance estimates for Antarctica. *Earth and  
549 Planetary Science Letters*, 414, 134-143.
- 550 Walpersdorf, A., Sue, C., Baize, S., Cotte, N., Bascou, P., Beauval, C., Collard, P., Daniel, G.,  
551 Dyer, H., Grasso, J.-R., Hauteceur, O., Helmstetter, A., Hok, S., Langlais, M., Menard, G.,  
552 Mousavi, Z., Ponton, F., Rizza, M., Rolland, L., Souami, D., & Martinod, J. (2015).  
553 Coherence between geodetic and seismic deformation in a context of slow tectonic activity  
554 (SW Alps, France). *Journal of Geodynamics*, 85, 58-65.
- 555 Watts, A. B. (2001). *Isostasy and Flexure of the Lithosphere*. Cambridge University Press.
- 556 Willis, M. J., Melkonian, A. K., Pritchard, M. E., & Rivera, A. (2012). Ice loss from the  
557 Southern Patagonian ice field, South America, between 2000 and 2012. *Geophysical research  
558 letters*, 39(17).



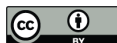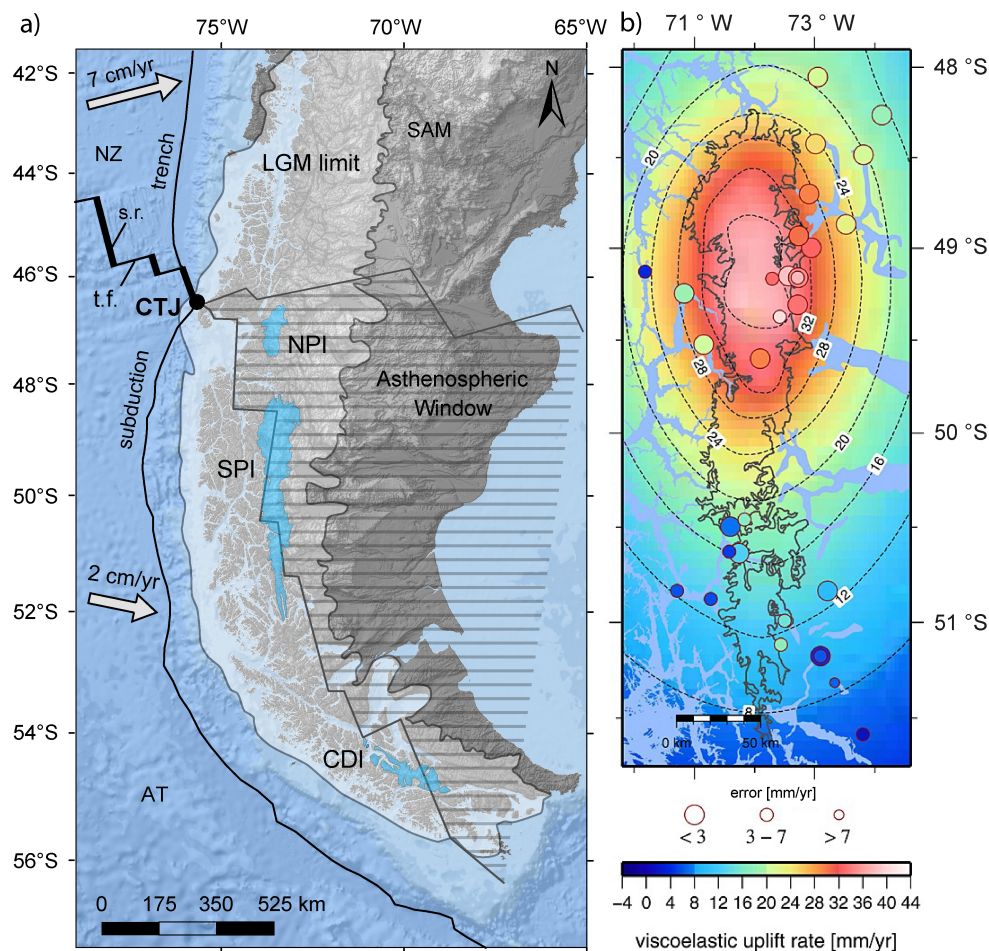

560 **Fig. 1. Regional context and uplift rate data.** a) Map of southern Patagonia with the Southern Patagonian Icefield (SPI), Northern  
 Patagonian Icefield (NPI), and the Cordillera Darwin Icefield (CDI) in light blue, the approximate extension of the icefields at the Last  
 Glacial Maximum (LGM limit), and the approximate extension of the present-day asthenospheric window (dashed region) beneath the  
 South American Continent (SAM). In the Pacific Ocean, the spreading ridges (s.r., thick black lines) and transform faults (t.f., thin black  
 lines) separate the Nazca (NZ) and the Antarctic (AT) plates. The subduction trench is also highlighted in black. The arrows show the  
 565 approximate rate and direction of subduction of the oceanic plates. b) Zoom on the SPI with GPS stations (circles) used to estimate the  
 viscoelastic uplift rates, from Lange et al. (2014).

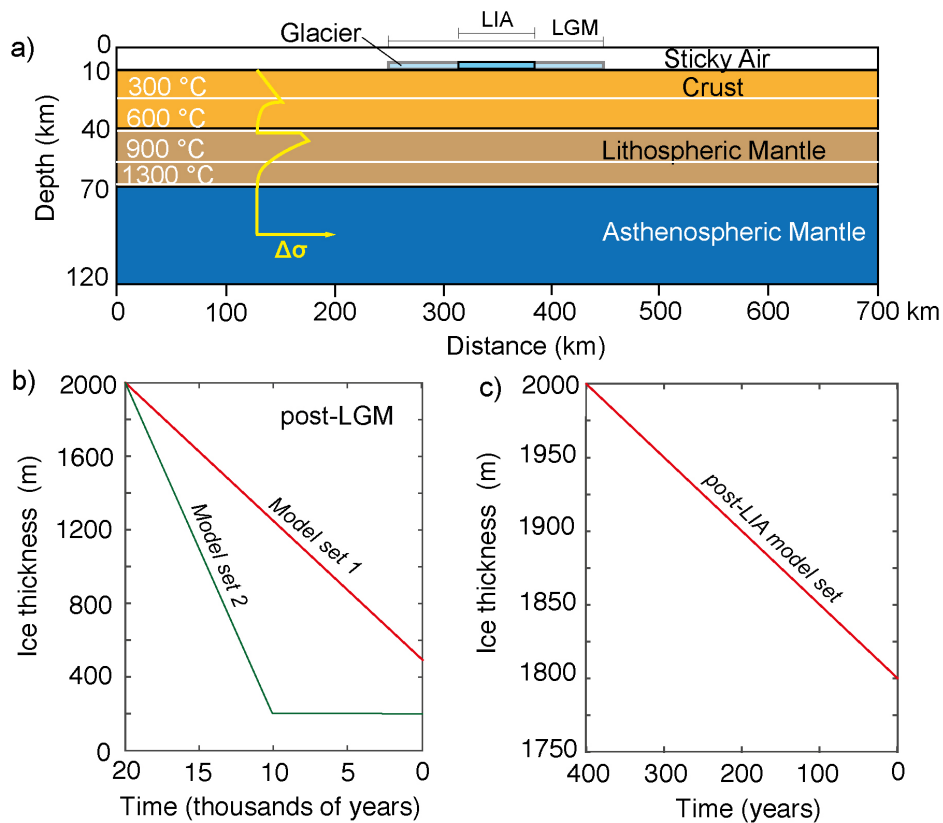

**Fig. 2. Reference numerical model setup.** a) Thermo-mechanical numerical model domain with rheological layers (Table 1), isotherms (white lines), and yield strength ( $\Delta\sigma$ ) profile (yellow line). (b, c) Ice thickness vs. time used in the numerical models to simulate the post-LGM deglaciation in two model sets (b), and the post-LIA deglaciation (c).

570

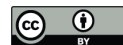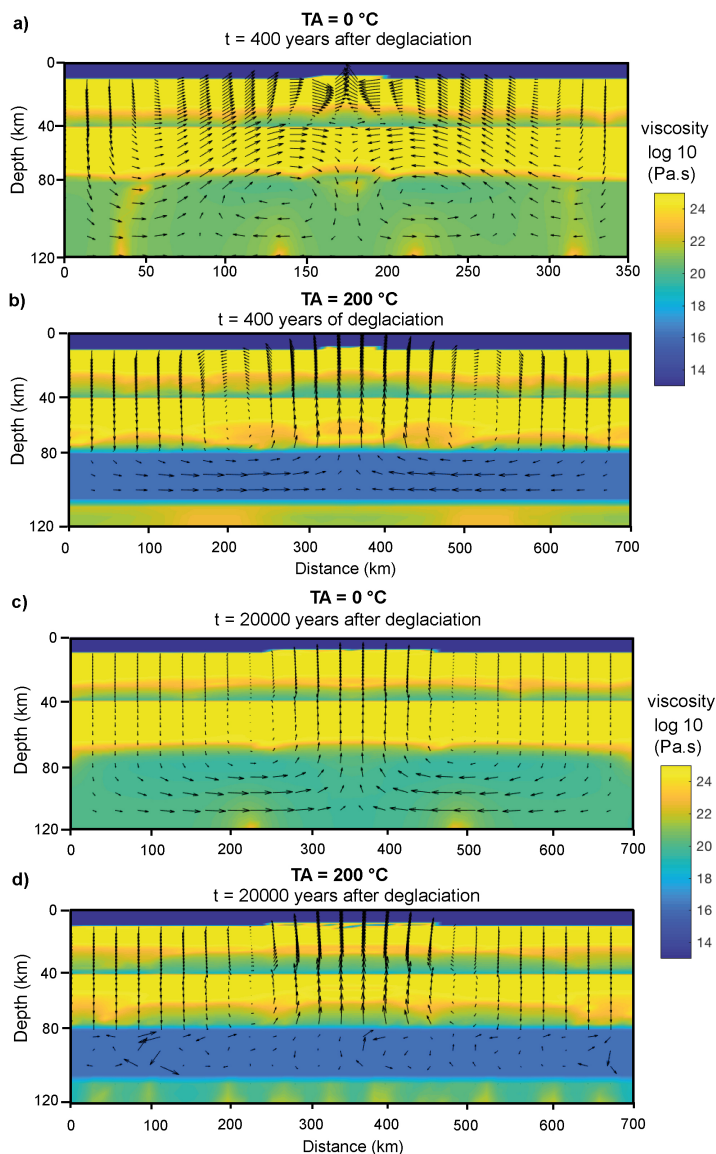

575 **Fig. 3. Distribution of viscosity and velocity vectors in the numerical models.** a) Reference model without an asthenospheric thermal anomaly, TA = 0 °C, and b) model with the higher simulated asthenospheric thermal anomaly, TA = 200 °C, in the last timestep of post-LIA deglaciation. c) Reference model with TA = 0 °C, and d) model with TA = 200 °C, in the last timestep of *Model set 1* of post-LGM deglaciation. Velocity vectors do not have the same scaling and are only meant for visualization purpose.

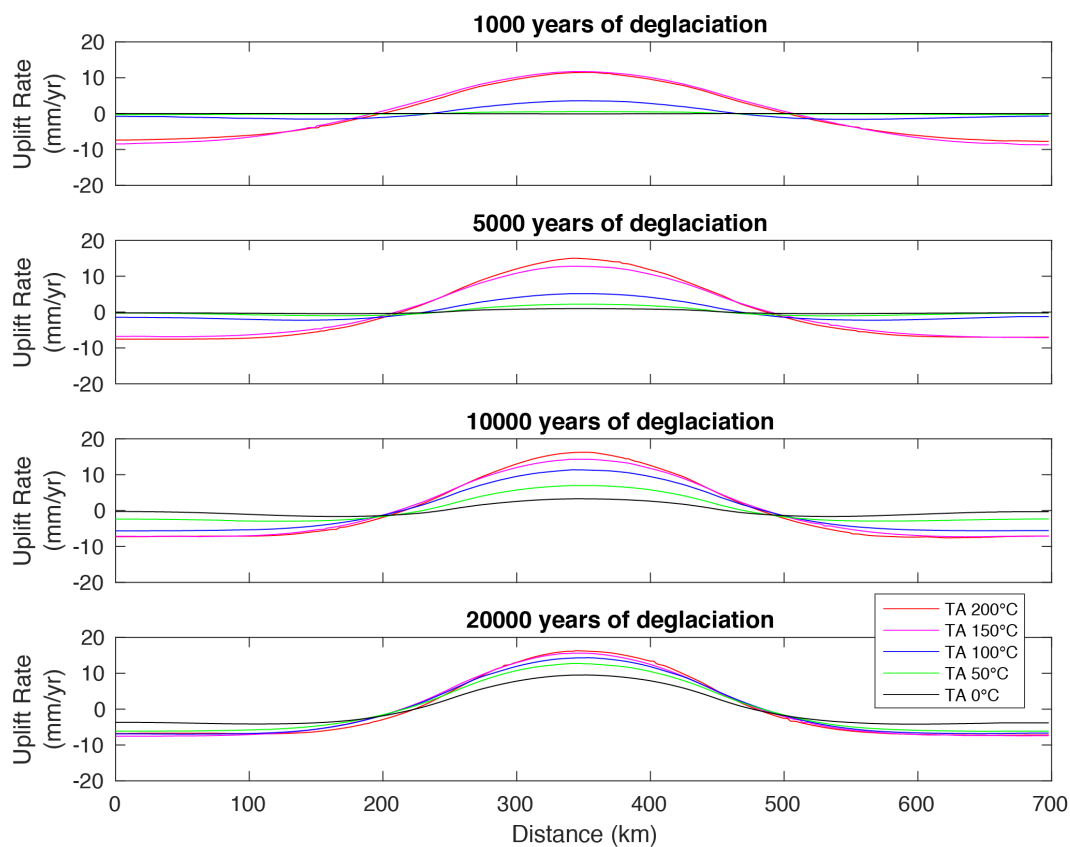

580 **Fig. 4. Surface uplift rates vs. distance for Model set 1 of post-LGM deglaciation.** a)  $t = 1000$  years of deglaciation, b)  $t = 5000$  years of deglaciation, c)  $t = 10000$  of deglaciation, d) 20000 years of deglaciation. Different line colours correspond to different TA.

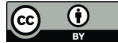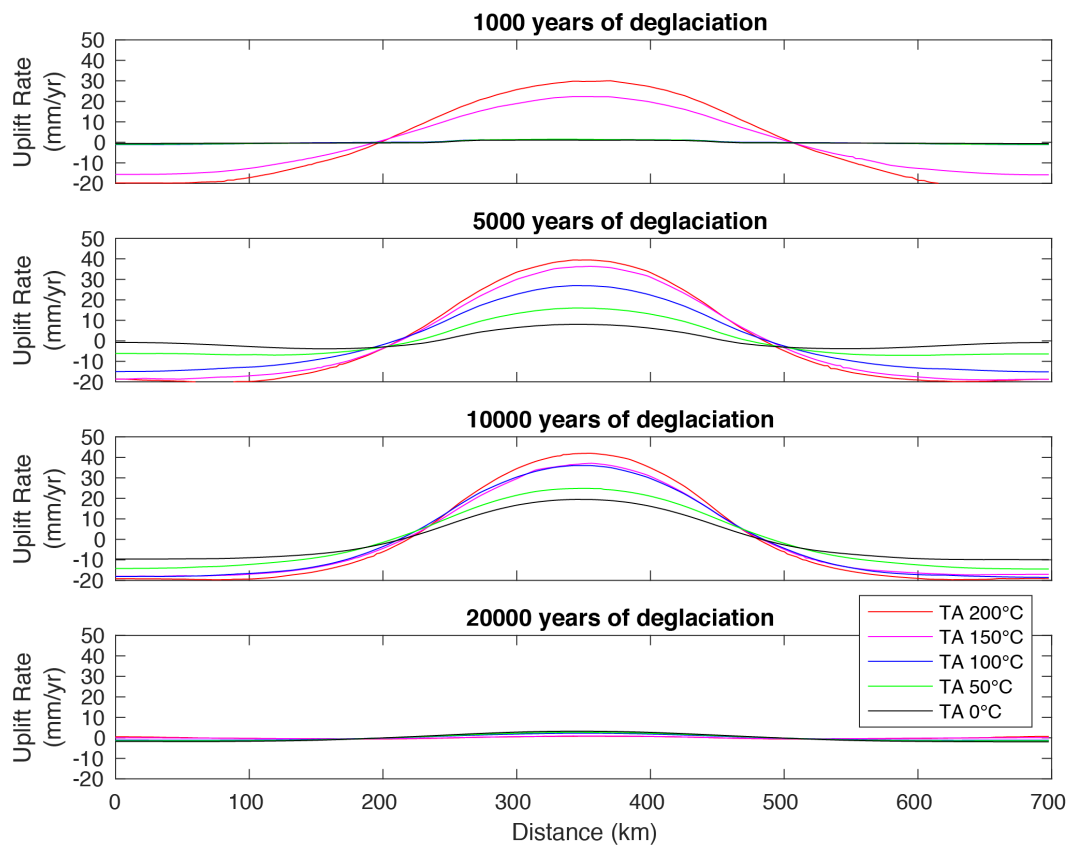

**Fig. 5. Surface uplift rates vs. distance for *Model set 2* of post-LGM deglaciation.** a)  $t = 1000$  years of deglaciation, b)  $t = 5000$  years of deglaciation, c)  $t = 10000$  of deglaciation, d) 20000 years of deglaciation. Different line colours correspond to different TA.

585

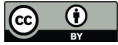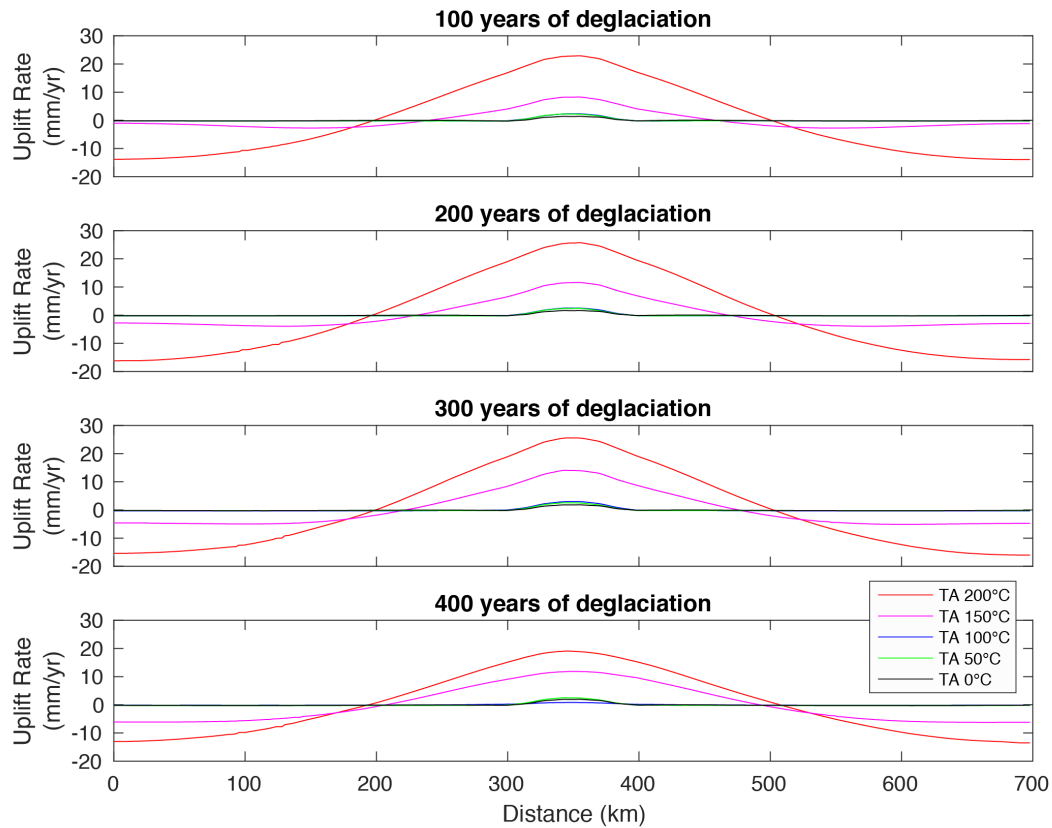

**Fig. 6.** Surface uplift rates vs. distance for post-LIA deglaciation model set. a)  $t = 100$  years of deglaciation, b)  $t = 200$  years of deglaciation, c)  $t = 300$  years of deglaciation, d) 400 years of deglaciation. Different line colours correspond to different TA.

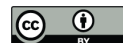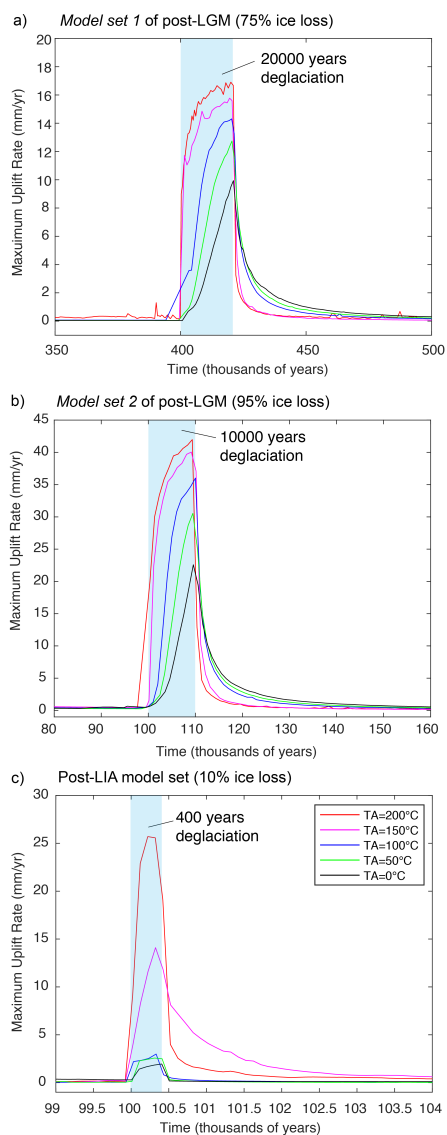

590 **Fig. 7. Maximum uplift rates vs. time for model sets of deglaciation with different TA.** a) *Model set 1* of post-LGM deglaciation accounting of 75% of ice loss in 20000 years, b) *Model set 2* of post-LGM deglaciation accounting of 95% of ice loss in 10000 years, and c) Post-LIA deglaciation model set accounting 10% of ice loss in 400 years (blue-shaded region). Blue-shaded regions highlight the modeled deglaciation intervals.

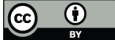

**Table 1** – Material properties used in the numerical experiments.

|                                        | $\rho_0^s$<br>(km/<br>m <sup>3</sup> ) | $E_a$<br>(kJ/mo<br>l) | $V_a$<br>(m <sup>3</sup> /<br>mol) | $n$ | $C$<br>(M<br>pa) | Visc.<br>flow<br>law | $Sin$<br>( $\phi_{eff}$ ) | $c$<br>(W/m/K)     | $\mu$<br>(Gp<br>a) | $C_p$<br>(J/kg/<br>K) | $H_r$<br>( $\mu$ W/<br>m <sup>3</sup> ) | $H_l$<br>(kJ/k<br>g) | $\alpha$<br>(1/<br>k) | $\beta$<br>(1/P<br>a) |
|----------------------------------------|----------------------------------------|-----------------------|------------------------------------|-----|------------------|----------------------|---------------------------|--------------------|--------------------|-----------------------|-----------------------------------------|----------------------|-----------------------|-----------------------|
| <b>Crust</b>                           | 2800                                   | 154                   | 0                                  | 2.3 | 10               | Wet<br>Qz.           | 0.2                       | $0.64+807/(T+77)$  | 10                 | 1000                  | 1                                       | 300                  | $3 \times 10^{-5}$    | $1 \times 10^{-11}$   |
| <b>Lithos-<br/>pheric<br/>mantle</b>   | 3250                                   | 532                   | 10                                 | 3.5 | 10               | Dry<br>Ol.           | 0.6                       | $0.73+1293/(T+77)$ | 67                 | 1000                  | 0.022                                   | 400                  | $3 \times 10^{-5}$    | $1 \times 10^{-11}$   |
| <b>Asthenos-<br/>pheric<br/>mantle</b> | 3250                                   | 532                   | 10                                 | 3.5 | 10               | Dry<br>Ol.           | 0.6                       | $0.73+1293/(T+77)$ | 67                 | 1000                  | 0.022                                   | 400                  | $3 \times 10^{-5}$    | $1 \times 10^{-11}$   |
| <b>Ice</b>                             | 920                                    | 154                   | 0                                  | 2.3 | 10               |                      | 0                         | $0.73+1293/(T+77)$ | 67                 | 1000                  | 0.022                                   | 400                  | $3 \times 10^{-5}$    | $1 \times 10^{-11}$   |

595  $\rho_0^s$  is the standard densities of solid rocks;  $E_a$  is the activation energy;  $V_a$  is the activation volume;  $n$  is the stress exponent;  $C$  is cohesion;  $\phi_{eff}$  is the effective internal friction angle;  $c$  is thermal conductivity;  $\mu$  is the shear modulus;  $C_p$  is the specific heat capacity;  $H_r$  and  $H_l$  are the radiogenic and latent heat productions, respectively;  $\alpha$  is thermal expansion;  $\beta$  is compressibility. Qz and Ol are quartzite and olivine, respectively. All rheological and partial melting laws/parameters are based on experimental rock mechanics and petrology (Ranalli, 1995; Hirschmann, 2000; Johannes, 1985; Turcotte and Schubert, 2002).

600





**Table 2 – Maximum uplift rates derived from the numerical models with a thermal anomaly (TA) of 0, 50, 100, 150 and 200 °C for the Model set 1 (a) and Model set 2 (b) of post-LGM deglaciation, and the post-LIA deglaciation model set (c).** The  $t = 0$  is the timestep immediately before the beginning of deglaciation. Fig. 7 is a plot of the maximum uplift rate vs. time calculated for each timestep in all numerical models.

| <b>a) Model set 1 of post-LGM deglaciation (20000 years)</b> |                             |                    |                    |                     |                     |                     |                     |
|--------------------------------------------------------------|-----------------------------|--------------------|--------------------|---------------------|---------------------|---------------------|---------------------|
| TA (°C)                                                      | Maximum uplift rate (mm/yr) |                    |                    |                     |                     |                     |                     |
| 0                                                            | 0.0425                      | 0.0412             | 0.9781             | 3.2849              | 6.4337              | 9.5049              | 4.9781              |
| 50                                                           | 0.0481                      | 0.5650             | 2.2171             | 6.9983              | 10.7568             | 12.7473             | 4.6591              |
| 100                                                          | 0.0674                      | 3.5812             | 5.1450             | 11.3702             | 13.6265             | 14.3080             | 4.0696              |
| 150                                                          | 0.0471                      | 11.7188            | 12.7860            | 14.3219             | 15.1838             | 15.5924             | 1.3896              |
| 200                                                          | 0.1513                      | 11.4839            | 15.0235            | 16.2639             | 16.4590             | 16.2576             | 0.8946              |
|                                                              | <b>t = 0</b>                | <b>t = 1000 yr</b> | <b>t = 5000 yr</b> | <b>t = 10000 yr</b> | <b>t = 15000 yr</b> | <b>t = 20000 yr</b> | <b>t = 25000 yr</b> |
| <b>b) Model set 2 of post-LGM deglaciation (10000 years)</b> |                             |                    |                    |                     |                     |                     |                     |
| TA (°C)                                                      | Maximum uplift rate (mm/yr) |                    |                    |                     |                     |                     |                     |
| 0                                                            | 0.5011                      | 1.0885             | 8.0324             | 19.4849             | 5.6972              | 3.1222              | 2.1536              |
| 50                                                           | 0.2527                      | 1.5170             | 15.9284            | 24.8744             | 5.2380              | 2.7184              | 1.7310              |
| 100                                                          | 0.3270                      | 1.2905             | 26.9424            | 36.0223             | 4.9357              | 2.3015              | 1.4085              |
| 150                                                          | 0.4273                      | 22.3004            | 36.3278            | 37.1107             | 1.9319              | 0.9322              | 0.5953              |
| 200                                                          | 0.3725                      | 30.0494            | 39.4609            | 41.9771             | 1.4801              | 0.7525              | 0.4868              |
|                                                              | <b>t = 0</b>                | <b>t = 1000 yr</b> | <b>t = 5000 yr</b> | <b>t = 10000 yr</b> | <b>t = 15000 yr</b> | <b>t = 20000 yr</b> | <b>t = 25000 yr</b> |
| <b>c) post-LIA deglaciation model set (400 years)</b>        |                             |                    |                    |                     |                     |                     |                     |
| TA (°C)                                                      | Maximum uplift rate (mm/yr) |                    |                    |                     |                     |                     |                     |
| 0                                                            | 0.4317                      | 1.4151             | 1.6660             | 1.8366              | 1.9492              | 0.1764              | 0.1025              |
| 50                                                           | 0.0352                      | 2.2776             | 2.4264             | 2.5706              | 2.4514              | 0.3044              | 0.2340              |
| 100                                                          | 0.0350                      | 2.2024             | 2.3235             | 2.5241              | 2.9878              | 0.4854              | 0.3775              |
| 150                                                          | 0.0933                      | 8.2708             | 11.5730            | 14.0325             | 11.8261             | 8.1148              | 7.1503              |
| 200                                                          | 0.0962                      | 22.8938            | 25.7002            | 25.572              | 18.9666             | 3.9966              | 2.5535              |
|                                                              | <b>t = 0</b>                | <b>t = 100 yr</b>  | <b>t = 200 yr</b>  | <b>t = 300 yr</b>   | <b>t = 400 yr</b>   | <b>t = 500 yr</b>   | <b>t = 600 yr</b>   |
